# Supplementary material
Source: publisher figshare collection journal article supplement (https://acs.figshare.com/ndownloader/files/13372886)
Supplement: Supplementary file 1 [file 13372886]

## Sheet: title page
			Supplementary Data

## Sheet: BRADYKININ-CHD AZIDE
	Immon.	b	b++	b+++	b+++-H2O	b+++-NH3	b++-H2O	b++-NH3	b-H2O	b-NH3	Seq.	y	y++	y+++	y+++-H2O	y+++-NH3	y++-H2O	y++-NH3	y-H2O	y-NH3	#
1	129.11										R	1060.57	530.79	354.19	348.19	348.52	521.78	522.27	1042.56	1043.54	9
2	70.07	254.16	127.58	85.39		79.72		119.07		237.14	P	904.47	452.74	302.16	296.16	296.49	443.73	444.22	886.46	887.44	8
3	70.07	351.21	176.11	117.74		112.07		167.6		334.19	P	807.41	404.21	269.81	263.81	264.13	395.21	395.7	789.4	790.39	7
4	30.03	408.24	204.62	136.75		131.07		196.11		391.21	G	710.36	355.68	237.46	231.46	231.78	346.68	347.17	692.35	693.33	6
5	120.08	555.3	278.16	185.77		180.1		269.64		538.28	F	653.34	327.17	218.45	212.45	212.78	318.17	318.66	635.33	636.31	5		FigureS3
6	60.04	642.34	321.67	214.78	208.78	209.11	312.67	313.16	624.33	625.31	S	506.27	253.64	169.43	163.43	163.75	244.63	245.13	488.26	489.25	4
7	70.07	739.39	370.2	247.13	241.13	241.46	361.19	361.68	721.38	722.36	P	419.24	210.12	140.42		134.74		201.61		402.21	3
8	120.08	886.46	443.73	296.16	290.15	290.48	434.73	435.22	868.45	869.43	F	322.19	161.6	108.07		102.39		153.08		305.16	2
9	129.11										R	175.12	88.06	59.04		53.37		79.55		158.09	1
#	Immon.	b	b++	b+++	b+++-H2O	b+++-NH3	b++-H2O	b++-NH3	b-H2O	b-NH3	Seq.	y	y++	y+++	y+++-H2O	y+++-NH3	y++-H2O	y++-NH3	y-H2O	y-NH3	#
1	129.11										R#	1498.84	749.93	500.29	494.28	494.61	740.92	741.41	1480.83	1481.82	9
2	70.07	473.3	237.15	158.44		152.76		228.64		456.27	P	1123.6	562.31	375.21	369.2	369.53	553.3	553.79	1105.59	1106.58	8
3	70.07	570.35	285.68	190.79		185.11		277.17		553.33	P	1026.55	513.78	342.86	336.85	337.18	504.77	505.27	1008.54	1009.52	7
4	30.03	627.37	314.19	209.8		204.12		305.68		610.35	G	929.5	465.25	310.5	304.5	304.83	456.25	456.74	911.49	912.47	6		Figure 2B
5	120.08	774.44	387.72	258.82		253.14		379.21		757.41	F	872.48	436.74	291.5	285.49	285.82	427.74	428.23	854.47	855.45	5
6	60.04	861.47	431.24	287.83	281.83	282.15	422.24	422.73	843.46	844.45	S	725.41	363.21	242.47	236.47	236.8	354.2	354.69	707.4	708.38	4
7	70.07	958.53	479.77	320.18	314.18	314.5	470.76	471.25	940.52	941.5	P	638.38	319.69	213.46		207.79		311.18		621.35	3
8	120.08	1105.59	553.3	369.2	363.2	363.53	544.3	544.79	1087.58	1088.57	F	541.32	271.17	181.11		175.44		262.65		524.3	2
9	129.11										R#	394.26	197.63	132.09		126.41		189.12		377.23	1

## Sheet: Neurotensin-CHD AZIDE
#	Immon.	b	b++	b+++	b+++-H2O	b+++-NH3	b++-H2O	b++-NH3	b-H2O	b-NH3	Seq.	y	y++	y+++	y+++-H2O	y+++-NH3	y++-H2O	y++-NH3	y-H2O	y-NH3	#
1	86.1										L	1672.92	836.96	558.31	552.31	552.63	827.96	828.45	1654.91	1655.89	12
2	136.08	388.19	194.6	130.07							Y	1448.8	724.9	483.6	477.6	477.93	715.9	716.39	1430.79	1431.77	11
3	102.06	517.23	259.12	173.08	167.08		250.11		499.22		E	1285.74	643.37	429.25	423.25	423.57	634.37	634.86	1267.73	1268.71	10
4	87.06	631.27	316.14	211.1	205.09	205.42	307.13	307.63	613.26	614.25	N	1156.69	578.85	386.24		380.56		570.34		1139.67	9
5	101.11	759.37	380.19	253.79	247.79	248.12	371.18	371.67	741.36	742.34	K	1042.65	521.83	348.22		342.55		513.32		1025.63	8
6	70.07	856.42	428.71	286.15	280.14	280.47	419.71	420.2	838.41	839.39	P	914.56	457.78	305.52		299.85		449.27		897.53	7
7	129.11	1012.52	506.76	338.18	332.18	332.5	497.76	498.25	994.51	995.5	R	817.5	409.26	273.17		267.5		400.74		800.48	6		FigureS3B
8	129.11	1168.62	584.82	390.21	384.21	384.54	575.81	576.3	1150.61	1151.6	R	661.4	331.2	221.14		215.46		322.69		644.38	5
9	70.07	1265.68	633.34	422.56	416.56	416.89	624.34	624.83	1247.66	1248.65	P	505.3	253.15	169.11							4
10	136.08	1428.74	714.87	476.92	470.91	471.24	705.87	706.36	1410.73	1411.71	Y	408.25	204.63	136.75							3
11	86.1	1541.82	771.42	514.61	508.61	508.94	762.41	762.9	1523.81	1524.8	I	245.19	123.1	82.4							2
12	86.1										L	132.1	66.55	44.71							1
#	Immon.	b	b++	b+++	b+++-H2O	b+++-NH3	b++-H2O	b++-NH3	b-H2O	b-NH3	Seq.	y	y++	y+++	y+++-H2O	y+++-NH3	y++-H2O	y++-NH3	y-H2O	y-NH3	#
1	86.1										L	2111.19	1056.1	704.4	698.4	698.73	1047.09	1047.59	2093.18	2094.16	12
2	136.08	388.19	194.6	130.07							Y	1887.07	944.04	629.7	623.69	624.02	935.04	935.53	1869.06	1870.05	11
3	102.06	517.23	259.12	173.08	167.08		250.11		499.22		E	1724.01	862.51	575.34	569.34	569.67	853.5	854	1706	1706.98	10
4	87.06	631.27	316.14	211.1	205.09	205.42	307.13	307.63	613.26	614.25	N	1594.97	797.99	532.33		526.65		789.47		1577.94	9
5	101.11	759.37	380.19	253.79	247.79	248.12	371.18	371.67	741.36	742.34	K	1480.93	740.97	494.31		488.64		732.45		1463.9	8		Figure2D
6	70.07	856.42	428.71	286.15	280.14	280.47	419.71	420.2	838.41	839.39	P	1352.83	676.92	451.62		445.94		668.41		1335.8	7
7	129.11	1231.66	616.33	411.22	405.22	405.55	607.33	607.82	1213.65	1214.63	R*	1255.78	628.39	419.26		413.59		619.88		1238.75	6
8	129.11	1606.9	803.95	536.3	530.3	530.63	794.95	795.44	1588.89	1589.87	R*	880.54	440.77	294.18		288.51		432.26		863.51	5
9	70.07	1703.95	852.48	568.65	562.65	562.98	843.47	843.97	1685.94	1686.92	P	505.3	253.15	169.11							4
10	136.08	1867.01	934.01	623.01	617.01	617.33	925	925.5	1849	1849.99	Y	408.25	204.63	136.75							3
11	86.1	1980.1	990.55	660.7	654.7	655.03	981.55	982.04	1962.09	1963.07	I	245.19	123.1	82.4							2
12	86.1										L	132.1	66.55	44.71							1

## Sheet: SUBSTANCE P-CHD AZIDE
#	Immon.	b	b++	b+++	b+++-NH3	b++-NH3	b-NH3	Seq.	y	y++	y+++	y+++-NH3	y++-NH3	y-NH3	#
1	129.11							R	1347.74	674.37	449.92	444.24	665.86	1330.71	11
2	70.07	254.16	127.58	85.39	79.72	119.07	237.14	P	1191.63	596.32	397.88	392.21	587.81	1174.61	10
3	101.11	382.26	191.63	128.09	122.41	183.12	365.23	K	1094.58	547.79	365.53	359.86	539.28	1077.55	9
4	70.07	479.31	240.16	160.44	154.77	231.65	462.28	P	966.49	483.75	322.83	317.16	475.23	949.46	8
5	101.07	607.37	304.19	203.13	197.45	295.67	590.34	Q	869.43	435.22	290.48	284.81	426.71	852.41	7
6	101.07	735.43	368.22	245.81	240.14	359.7	718.4	Q	741.37	371.19	247.8	242.12	362.68	724.35	6		FigureS4B-top
7	120.08	882.49	441.75	294.84	289.16	433.24	865.47	F	613.32	307.16	205.11				5
8	120.08	1029.56	515.29	343.86	338.18	506.77	1012.54	F	466.25	233.63	156.09				4
9	30.03	1086.58	543.8	362.87	357.19	535.28	1069.56	G	319.18	160.09	107.06				3
10	86.1	1199.67	600.34	400.56	394.89	591.82	1182.64	L	262.16	131.58	88.06				2
11	104.05							M	149.07	75.04	50.36				1
#	Immon.	b	b++	b+++	b+++-NH3	b++-NH3	b-NH3	Seq.	y	y++	y+++	y+++-NH3	y++-NH3	y-NH3	#
1	129.11							R*	1566.87	783.94	522.96	517.29	775.43	1549.85	11
2	70.07	473.3	237.15	158.44	152.76	228.64	456.27	P	1191.63	596.32	397.88	392.21	587.81	1174.61	10
3	101.11	601.39	301.2	201.14	195.46	292.69	584.37	K	1094.58	547.79	365.53	359.86	539.28	1077.55	9
4	70.07	698.45	349.73	233.49	227.81	341.21	681.42	P	966.49	483.75	322.83	317.16	475.23	949.46	8		FigureS4B-bottom
5	101.07	826.51	413.76	276.17	270.5	405.24	809.48	Q	869.43	435.22	290.48	284.81	426.71	852.41	7
6	101.07	954.56	477.79	318.86	313.18	469.27	937.54	Q	741.37	371.19	247.8	242.12	362.68	724.35	6
7	120.08	1101.63	551.32	367.88	362.21	542.81	1084.61	F	613.32	307.16	205.11				5
8	120.08	1248.7	624.85	416.91	411.23	616.34	1231.67	F	466.25	233.63	156.09				4
9	30.03	1305.72	653.36	435.91	430.24	644.85	1288.7	G	319.18	160.09	107.06				3
10	86.1	1418.81	709.91	473.61	467.93	701.39	1401.78	L	262.16	131.58	88.06				2
11	104.05							M	149.07	75.04	50.36				1

## Sheet: SUBSTANC P SPIKED-Click(2+)
#	Immon.	b	b++	b+++	b+++-NH3	b++-NH3	b-NH3	Seq.	y	y++	y+++	y+++-NH3	y++-NH3	y-NH3	#
1	129.11							R#	2024.45	1012.73	675.49	669.81	1004.22	2007.43	11
2	70.07	930.88	465.94	310.96	305.29	457.43	913.85	P	1191.63	596.32	397.88	392.21	587.81	1174.61	10
3	101.11	1058.97	529.99	353.66	347.99	521.48	1041.95	K	1094.58	547.79	365.53	359.86	539.28	1077.55	9
4	70.07	1156.03	578.52	386.01	380.34	570	1139	P	966.49	483.75	322.83	317.16	475.23	949.46	8
5	101.07	1284.09	642.55	428.7	423.02	634.03	1267.06	Q	869.43	435.22	290.48	284.81	426.71	852.41	7		Figure3
6	101.07	1412.14	706.58	471.39	465.71	698.06	1395.12	Q	741.37	371.19	247.8	242.12	362.68	724.35	6
7	120.08	1559.21	780.11	520.41	514.73	771.6	1542.19	F	613.32	307.16	205.11				5
8	120.08	1706.28	853.64	569.43	563.76	845.13	1689.25	F	466.25	233.63	156.09				4
9	30.03	1763.3	882.15	588.44	582.76	873.64	1746.28	G	319.18	160.09	107.06				3
10	86.1	1876.39	938.7	626.13	620.46	930.18	1859.36	L	262.16	131.58	88.06				2
11	104.05							M	149.07	75.04	50.36				1

## Sheet: ARG 33 RNASE A
#	Immon.	b	b++	b+++	b+++-H2O	b+++-NH3	b++-H2O	b++-NH3	b-H2O	b-NH3	Seq.	y	y++	y+++	y+++-H2O	y+++-NH3	y++-H2O	y++-NH3	y-H2O	y-NH3	#
1	60.04										S	718.42	359.71	240.15	234.14	234.47	350.71	351.2	700.41	701.39	6
2	129.11	244.14	122.57	82.05	76.05	76.38	113.57	114.06	226.13	227.11	R	631.39	316.2	211.13	205.13	205.46	307.19	307.68	613.38	614.36	5
3	87.06	358.18	179.6	120.07	114.06	114.39	170.59	171.08	340.17	341.16	N	475.29	238.15	159.1	153.1	153.42	229.14	229.63	457.28	458.26	4
4	86.1	471.27	236.14	157.76	151.76	152.09	227.13	227.62	453.26	454.24	L	361.24	181.13	121.09	115.08	115.41	172.12	172.61	343.23	344.22	3		Figure4A
5	74.06	572.32	286.66	191.44	185.44	185.77	277.66	278.15	554.31	555.29	T	248.16	124.58	83.39	77.39	77.72	115.58	116.07	230.15	231.13	2
6	101.11										K	147.11	74.06	49.71		44.03		65.55		130.09	1
#	Immon.	b	b++	b+++	b+++-H2O	b+++-NH3	b++-H2O	b++-NH3	b-H2O	b-NH3	Seq.	y	y++	y+++	y+++-H2O	y+++-NH3	y++-H2O	y++-NH3	y-H2O	y-NH3	#
1	60.04										S	937.56	469.28	313.19	307.19	307.52	460.28	460.77	919.55	920.53	6
2	129.11	463.28	232.14	155.1	149.09	149.42	223.14	223.63	445.27	446.25	R*	850.53	425.77	284.18	278.18	278.5	416.76	417.25	832.51	833.5	5
3	87.06	577.32	289.16	193.11	187.11	187.44	280.16	280.65	559.31	560.29	N	475.29	238.15	159.1	153.1	153.42	229.14	229.63	457.28	458.26	4		Figure4B
4	86.1	690.41	345.71	230.81	224.8	225.13	336.7	337.19	672.39	673.38	L	361.24	181.13	121.09	115.08	115.41	172.12	172.61	343.23	344.22	3
5	74.06	791.45	396.23	264.49	258.49	258.81	387.22	387.72	773.44	774.43	T	248.16	124.58	83.39	77.39	77.72	115.58	116.07	230.15	231.13	2
6	101.11										K	147.11	74.06	49.71		44.03		65.55		130.09	1
#	Immon.	b	b++	b+++	b+++-H2O	b+++-NH3	b++-H2O	b++-NH3	b-H2O	b-NH3	Seq.	y	y++	y+++	y+++-H2O	y+++-NH3	y++-H2O	y++-NH3	y-H2O	y-NH3	#
1	60.04										S	1395.14	698.07	465.72	459.71	460.04	689.07	689.56	1377.13	1378.11	6
2	129.11	920.86	460.93	307.62	301.62	301.95	451.93	452.42	902.85	903.83	R#	1308.11	654.56	436.71	430.7	431.03	645.55	646.04	1290.09	1291.08	5
3	87.06	1034.9	517.95	345.64	339.64	339.96	508.95	509.44	1016.89	1017.87	N	475.29	238.15	159.1	153.1	153.42	229.14	229.63	457.28	458.26	4		Figure S6
4	86.1	1147.99	574.5	383.33	377.33	377.66	565.49	565.98	1129.97	1130.96	L	361.24	181.13	121.09	115.08	115.41	172.12	172.61	343.23	344.22	3
5	74.06	1249.03	625.02	417.02	411.01	411.34	616.01	616.51	1231.02	1232.01	T	248.16	124.58	83.39	77.39	77.72	115.58	116.07	230.15	231.13	2
6	101.11										K	147.11	74.06	49.71		44.03		65.55		130.09	1

## Sheet: ARG 39 RNASE A
#	Immon.	b	b++	b+++	b+++-H2O	b+++-NH3	b++-H2O	b++-NH3	b-H2O	b-NH3	Seq.	y	y++	y+++	y+++-H2O	y+++-NH3	y++-H2O	y++-NH3	y-H2O	y-NH3	#
1	88.04										D	3007.49	1504.25	1003.17	997.16	997.49	1495.24	1495.73	2989.48	2990.46	24
2	129.11	491.27	246.14	164.43	158.43	158.75	237.13	237.63	473.26	474.25	R*	2892.46	1446.73	964.82	958.82	959.15	1437.73	1438.22	2874.45	2875.43	23
3	76.02	651.3	326.16	217.77	211.77	212.1	317.15	317.64	633.29	634.28	C!	2517.22	1259.11	839.75	833.74	834.07	1250.11	1250.6	2499.21	2500.2	22
4	101.11	779.4	390.2	260.47	254.47	254.8	381.2	381.69	761.39	762.37	K	2357.19	1179.1	786.4	780.4	780.73	1170.09	1170.59	2339.18	2340.16	21
5	70.07	876.45	438.73	292.82	286.82	287.15	429.72	430.22	858.44	859.42	P	2229.1	1115.05	743.7	737.7	738.03	1106.05	1106.54	2211.09	2212.07	20
6	72.08	975.52	488.26	325.84	319.84	320.17	479.26	479.75	957.51	958.49	V	2132.04	1066.53	711.35	705.35	705.68	1057.52	1058.01	2114.03	2115.02	19
7	87.06	1089.56	545.29	363.86	357.86	358.18	536.28	536.77	1071.55	1072.54	N	2032.98	1016.99	678.33	672.33	672.65	1007.99	1008.48	2014.96	2015.95	18
8	74.06	1190.61	595.81	397.54	391.54	391.87	586.8	587.3	1172.6	1173.58	T	1918.93	959.97	640.32	634.31	634.64	950.96	951.46	1900.92	1901.91	17
9	120.08	1337.68	669.34	446.56	440.56	440.89	660.34	660.83	1319.67	1320.65	F	1817.88	909.45	606.63	600.63	600.96	900.44	900.93	1799.87	1800.86	16
10	72.08	1436.75	718.88	479.59	473.58	473.91	709.87	710.36	1418.74	1419.72	V	1670.82	835.91	557.61	551.61	551.93	826.91	827.4	1652.81	1653.79	15
11	110.07	1573.81	787.41	525.27	519.27	519.6	778.4	778.89	1555.8	1556.78	H	1571.75	786.38	524.59	518.58	518.91	777.37	777.86	1553.74	1554.72	14
12	102.06	1702.85	851.93	568.29	562.28	562.61	842.92	843.41	1684.84	1685.82	E	1434.69	717.85	478.9	472.9	473.23	708.84	709.33	1416.68	1417.66	13		FigureS5A
13	60.04	1789.88	895.44	597.3	591.29	591.62	886.44	886.93	1771.87	1772.85	S	1305.65	653.33	435.89	429.88	430.21	644.32	644.81	1287.64	1288.62	12
14	86.1	1902.96	951.99	634.99	628.99	629.32	942.98	943.47	1884.95	1885.94	L	1218.61	609.81	406.88	400.87	401.2	600.81	601.3	1200.6	1201.59	11
15	44.05	1974	987.5	658.67	652.67	653	978.5	978.99	1955.99	1956.98	A	1105.53	553.27	369.18	363.18	363.51	544.26	544.76	1087.52	1088.5	10
16	88.04	2089.03	1045.02	697.01	691.01	691.34	1036.01	1036.5	2071.02	2072	D	1034.49	517.75	345.5	339.5	339.83	508.74	509.24	1016.48	1017.47	9
17	72.08	2188.1	1094.55	730.04	724.03	724.36	1085.55	1086.04	2170.09	2171.07	V	919.47	460.24	307.16	301.16	301.48	451.23	451.72	901.46	902.44	8
18	101.07	2316.16	1158.58	772.72	766.72	767.05	1149.58	1150.07	2298.15	2299.13	Q	820.4	410.7	274.14	268.13	268.46	401.7	402.19	802.39	803.37	7
19	44.05	2387.19	1194.1	796.4	790.4	790.73	1185.09	1185.59	2369.18	2370.17	A	692.34	346.67	231.45	225.45	225.78	337.67	338.16	674.33	675.31	6
20	72.08	2486.26	1243.63	829.43	823.42	823.75	1234.63	1235.12	2468.25	2469.23	V	621.3	311.15	207.77	201.77	202.1	302.15	302.64	603.29	604.28	5
21	76.02	2646.29	1323.65	882.77	876.77	877.09	1314.64	1315.14	2628.28	2629.27	C!	522.23	261.62	174.75	168.75	169.07	252.62	253.11	504.22	505.21	4
22	60.04	2733.32	1367.17	911.78	905.78	906.1	1358.16	1358.65	2715.31	2716.3	S	362.2	181.61	121.41	115.4	115.73	172.6	173.09	344.19	345.18	3
23	101.07	2861.38	1431.19	954.47	948.46	948.79	1422.19	1422.68	2843.37	2844.36	Q	275.17	138.09	92.4		86.72		129.58		258.14	2
24	101.11										K	147.11	74.06	49.71		44.03		65.55		130.09	1
#	Immon.	b	b++	b+++	b+++-H2O	b+++-NH3	b++-H2O	b++-NH3	b-H2O	b-NH3	Seq.	y	y++	y+++	y+++-H2O	y+++-NH3	y++-H2O	y++-NH3	y-H2O	y-NH3	#
1	88.04										D	3465.07	1733.04	1155.69	1149.69	1150.02	1724.03	1724.52	3447.06	3448.04	24
2	129.11	948.85	474.93	316.96	310.95	311.28	465.92	466.42	930.84	931.83	R#	3350.04	1675.52	1117.35	1111.35	1111.68	1666.52	1667.01	3332.03	3333.01	23
3	76.02	1108.88	554.95	370.3	364.3	364.62	545.94	546.43	1090.87	1091.86	C!	2517.22	1259.11	839.75	833.74	834.07	1250.11	1250.6	2499.21	2500.2	22
4	101.11	1236.98	618.99	413	406.99	407.32	609.99	610.48	1218.97	1219.95	K	2357.19	1179.1	786.4	780.4	780.73	1170.09	1170.59	2339.18	2340.16	21
5	70.07	1334.03	667.52	445.35	439.35	439.67	658.51	659.01	1316.02	1317.01	P	2229.1	1115.05	743.7	737.7	738.03	1106.05	1106.54	2211.09	2212.07	20
6	72.08	1433.1	717.05	478.37	472.37	472.7	708.05	708.54	1415.09	1416.07	V	2132.04	1066.53	711.35	705.35	705.68	1057.52	1058.01	2114.03	2115.02	19
7	87.06	1547.14	774.08	516.39	510.38	510.71	765.07	765.56	1529.13	1530.12	N	2032.98	1016.99	678.33	672.33	672.65	1007.99	1008.48	2014.96	2015.95	18
8	74.06	1648.19	824.6	550.07	544.06	544.39	815.59	816.09	1630.18	1631.16	T	1918.93	959.97	640.32	634.31	634.64	950.96	951.46	1900.92	1901.91	17
9	120.08	1795.26	898.13	599.09	593.09	593.42	889.13	889.62	1777.25	1778.23	F	1817.88	909.45	606.63	600.63	600.96	900.44	900.93	1799.87	1800.86	16		FigureS5B
10	72.08	1894.33	947.67	632.11	626.11	626.44	938.66	939.15	1876.32	1877.3	V	1670.82	835.91	557.61	551.61	551.93	826.91	827.4	1652.81	1653.79	15
11	110.07	2031.39	1016.2	677.8	671.8	672.12	1007.19	1007.68	2013.38	2014.36	H	1571.75	786.38	524.59	518.58	518.91	777.37	777.86	1553.74	1554.72	14
12	102.06	2160.43	1080.72	720.81	714.81	715.14	1071.71	1072.2	2142.42	2143.4	E	1434.69	717.85	478.9	472.9	473.23	708.84	709.33	1416.68	1417.66	13
13	60.04	2247.46	1124.23	749.83	743.82	744.15	1115.23	1115.72	2229.45	2230.43	S	1305.65	653.33	435.89	429.88	430.21	644.32	644.81	1287.64	1288.62	12
14	86.1	2360.54	1180.78	787.52	781.52	781.84	1171.77	1172.26	2342.53	2343.52	L	1218.61	609.81	406.88	400.87	401.2	600.81	601.3	1200.6	1201.59	11
15	44.05	2431.58	1216.29	811.2	805.2	805.52	1207.29	1207.78	2413.57	2414.56	A	1105.53	553.27	369.18	363.18	363.51	544.26	544.76	1087.52	1088.5	10
16	88.04	2546.61	1273.81	849.54	843.54	843.87	1264.8	1265.29	2528.6	2529.58	D	1034.49	517.75	345.5	339.5	339.83	508.74	509.24	1016.48	1017.47	9
17	72.08	2645.68	1323.34	882.56	876.56	876.89	1314.34	1314.83	2627.67	2628.65	V	919.47	460.24	307.16	301.16	301.48	451.23	451.72	901.46	902.44	8
18	101.07	2773.74	1387.37	925.25	919.25	919.57	1378.37	1378.86	2755.73	2756.71	Q	820.4	410.7	274.14	268.13	268.46	401.7	402.19	802.39	803.37	7
19	44.05	2844.77	1422.89	948.93	942.93	943.25	1413.88	1414.38	2826.76	2827.75	A	692.34	346.67	231.45	225.45	225.78	337.67	338.16	674.33	675.31	6
20	72.08	2943.84	1472.42	981.95	975.95	976.28	1463.42	1463.91	2925.83	2926.81	V	621.3	311.15	207.77	201.77	202.1	302.15	302.64	603.29	604.28	5
21	76.02	3103.87	1552.44	1035.3	1029.29	1029.62	1543.43	1543.93	3085.86	3086.85	C!	522.23	261.62	174.75	168.75	169.07	252.62	253.11	504.22	505.21	4
22	60.04	3190.9	1595.96	1064.31	1058.3	1058.63	1586.95	1587.44	3172.89	3173.88	S	362.2	181.61	121.41	115.4	115.73	172.6	173.09	344.19	345.18	3
23	101.07	3318.96	1659.98	1106.99	1100.99	1101.32	1650.98	1651.47	3300.95	3301.94	Q	275.17	138.09	92.4		86.72		129.58		258.14	2
24	101.11										K	147.11	74.06	49.71		44.03		65.55		130.09	1
